# Supplementary material
Source: publisher figshare collection journal article supplement (https://acs.figshare.com/ndownloader/files/33220896)
Supplement: Supplementary file 1 [file 33220896]

SUPPORTING INFORMATION FOR:

**Nonadiabatic Molecular Dynamics  
by Multiconfiguration Pair-Density Functional Theory**

Paul B. Calio,<sup>1</sup> Donald G. Truhlar,<sup>2,\*</sup> and Laura Gagliardi<sup>3,4,\*</sup>

<sup>1</sup>Department of Chemistry, Chicago Center for Theoretical Chemistry, James Franck Institute, University of Chicago, Chicago, Illinois, United States

<sup>2</sup>Department of Chemistry, Chemical Theory Center, and Minnesota Supercomputing Institute, University of Minnesota, Minneapolis, Minnesota, United States

<sup>3</sup>Department of Chemistry, Center for Theoretical Chemistry, Pritzker School of Molecular Engineering, Chicago James Franck Institute, University of Chicago, Chicago, Illinois, United States

<sup>4</sup>Argonne National Laboratory, Lemont, Illinois, United States

\*Corresponding author

Table of Contents

|                                                                                                                |     |
|----------------------------------------------------------------------------------------------------------------|-----|
| Section S1. Coordinates, C–S bond distances, and absolute energies<br>of optimized thioformaldehyde structures | S-2 |
| Section S2. Relativistic Basis Set Dependence on the Excitation Energies                                       | S-3 |
| Section S3. Molecular orbitals for the (10,6) active space                                                     | S-4 |
| Section S4. Wigner Distribution Frequencies (cm <sup>-1</sup> )                                                | S-4 |
| Section S5. <i>SHARC</i> Input files                                                                           | S-5 |
| Section S6. Potential energy along the C-S bond stretch coordinate                                             | S-6 |
| References                                                                                                     | S-7 |

# Section S1. Optimized structures and their energies

Table S1. Coordinates (in Å) of optimized thioformaldehyde ground-state structures

| SA-CASSCF(10,6)  |             |             |             | MC-PDFT(10,6)  |             |             |             |
|------------------|-------------|-------------|-------------|----------------|-------------|-------------|-------------|
| S                | 0.00000004  | -0.00000000 | 0.59577926  | S              | -0.00000002 | 0.00000000  | 0.60125191  |
| C                | -0.00000016 | 0.00000000  | -1.02982499 | C              | 0.00000007  | -0.00000000 | -1.01943135 |
| H                | 0.00000006  | 0.92316560  | -1.60177713 | H              | -0.00000003 | 0.93561423  | -1.60971028 |
| H                | 0.00000006  | -0.92316560 | -1.60177713 | H              | -0.00000003 | -0.93561423 | -1.60971028 |
| SA-CASSCF(12,10) |             |             |             | MC-PDFT(12,10) |             |             |             |
| S                | -0.00001935 | -0.00000000 | 0.61994676  | S              | 0.00000001  | 0.00000000  | 0.60475156  |
| C                | 0.00007317  | 0.00000000  | -1.02391928 | C              | -0.00000003 | -0.00000000 | -1.02387855 |
| H                | -0.00002691 | 0.94165948  | -1.61681374 | H              | 0.00000001  | 0.93951028  | -1.60923651 |
| H                | -0.00002691 | -0.94165948 | -1.61681373 | H              | 0.00000001  | -0.93951028 | -1.60923651 |

Table S2. The C–S bond distances (in Å) in the optimized structures

|                  |       |
|------------------|-------|
| SA-CASSCF(10,6)  | 1.626 |
| MC-PDFT(10,6)    | 1.621 |
| SA-CASSCF(12,10) | 1.644 |
| MC-PDFT(12,10)   | 1.629 |

Table S3. Electronic energies (in  $E_h$ ) of optimized thioformaldehyde structure

|                  | $S_0$   | $S_1$   | $T_1$   | $T_2$   |
|------------------|---------|---------|---------|---------|
| SA-CASSCF(10,6)  | -437.50 | -437.42 | -437.43 | -437.39 |
| MC-PDFT(10,6)    | -438.16 | -438.08 | -438.09 | -438.03 |
| SA-CASSCF(12,10) | -437.58 | -437.49 | -437.50 | -437.45 |
| MC-PDFT(12,10)   | -438.16 | -438.07 | -438.09 | -438.03 |

## Section S2. Relativistic Basis Set Dependence on the Excitation Energies

We evaluate the accuracy of the cc-pVDZ basis set with the Douglas-Kroll-Hess Hamiltonian by calculating the SA-CASSCF(10,6) vertical excitation energy using the cc-pVDZ-DK basis set with the Douglas-Kroll-Hess Hamiltonian. Calculations were performed using OpenMolcas v21.10. We also examine the vertical excitation energies for cc-pVDZ-DK optimized structure of thioformaldehyde. Energies in the manuscript use the nonrelativistic energies, but here we present the nonrelativistic and relativistic energies under the Energy column to show their dependence on the basis sets. We note that the vertical excitation are nearly identical when using the cc-pVDZ and the cc-pVDZ-DK basis set.

Table S4: SA-CASSCF(10,6) Vertical Excitation Energy

| Basis Set                                           | Energy       | S <sub>1</sub> | T <sub>1</sub> | T <sub>2</sub> |
|-----------------------------------------------------|--------------|----------------|----------------|----------------|
| <b>Previous Work<sup>1</sup></b>                    |              |                |                |                |
| cc-pVDZ                                             | Not Provided | 2.31           | 2.03           | 3.09           |
| <b>Present Work: cc-pVDZ Optimized Structure</b>    |              |                |                |                |
| cc-pVDZ<br>(In paper)                               | nonrelative  | 2.31           | 2.02           | 3.08           |
| cc-pVDZ                                             | relative     | 2.31           | 2.03           | 3.07           |
| cc-pVDZ-DK                                          | nonrelative  | 2.31           | 2.03           | 3.08           |
| cc-pVDZ-DK                                          | relative     | 2.31           | 2.02           | 3.07           |
| <b>Present Work: cc-pVDZ-DK Optimized Structure</b> |              |                |                |                |
| cc-pVDZ                                             | nonrelative  | 2.30           | 2.02           | 3.07           |
| cc-pVDZ                                             | relative     | 2.31           | 2.02           | 3.07           |
| cc-pVDZ-DK                                          | nonrelative  | 2.30           | 2.02           | 3.07           |
| cc-pVDZ-DK                                          | relative     | 2.31           | 2.02           | 3.07           |

### Section S3. Molecular Orbitals for the (10,6) Active Space

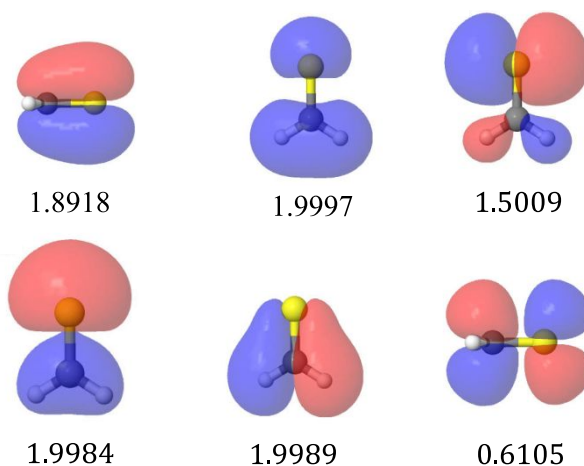

**Figure S1.** Molecular orbitals for the (10,6) active space. The orbitals were plotted using a cutoff of 0.025 a.u.

### Section S4. Wigner Distribution Frequencies ( $\text{cm}^{-1}$ )

The Wigner Distribution was used to generate 10,000 initial conditions using the normal mode frequencies in Table S4. The excitation energies and transition dipole moment of all configurations are presented in the attached folder in the directory “1\_Wigner\_Distribution”. The files in this directory follow the format of initconds.excited in the *SHARC* package. The initial conditions for the simulations are selected using the procedure of Barbatti et al.<sup>2</sup> using *SHARC*’s excite.py script.

Table S5. Normal mode frequencies ( $\text{cm}^{-1}$ )

|   | SA-CASSCF(10,6) | SA-CASSCF(12,10) |
|---|-----------------|------------------|
| 1 | 3364.0          | 3067.1           |
| 2 | 3261.2          | 2977.3           |
| 3 | 1582.6          | 1469.4           |
| 4 | 1101.3          | 1034.8           |
| 5 | 1058.0          | 994.5            |
| 6 | 962.7           | 965.6            |

## Section S5. *SHARC* Input files

All *SHARC* input and output files follow the format documented in the *SHARC* manual, with the exception of the MOLCAS.template file. Here we present the input file that was representative for all simulations. The files of the various methods differ by the following: 1) ezero values, 2) rngseed, and 3) tmax value. All SA-CASSCF simulations were ran for a tmax value of 1,000, while MC-PDFT simulations were ran for 500 fs. Example simulations for SA-CASSCF and MC-PDFT can be found in the attached folder.

To run *SHARC* simulations with MC-PDFT, one simply needs to replace the SHARC\_MOLCAS.py script in the \$SHARC directory (sharc/bin directory) with the SHARC\_MOLCAS.py script in the attached folder. One then needs to set the method in the MOLCAS.template file to MCPDFT and add the line “functional” with the corresponding MC-PDFT functional one would like to use. The script is set up to use tPBE, tBLYP, tLSDA, trevPBE, ftPBE, ftBLYP, ftLSDA, and ftrevPBE. The SHARC\_MOLCAS.py has only been verified to work for tPBE.

| <u>File Name: input</u>  | <u>File Name: MOLCAS.template</u> |
|--------------------------|-----------------------------------|
| printlevel 2             | basis cc-pVDZ                     |
| geomfile "geom"          | ras2 6                            |
| veloc external           | nactel 10                         |
| velocfile "veloc"        | inactive 7                        |
|                          | roots 2 0 2                       |
| nstates 2 0 2            | method MCPDFT                     |
| actstates 2 0 2          | functional TPBE                   |
| state 2 mch              |                                   |
| coeff auto               |                                   |
| rngseed -22004           |                                   |
| ezero -438.1634787000    |                                   |
| tmax 500.000             |                                   |
| stepsize 0.500000        |                                   |
| nsubsteps 25             |                                   |
| surf diagonal            |                                   |
| coupling overlap         |                                   |
| gradcorrect              |                                   |
| ekincorrect parallel_vel |                                   |
| reflect_frustrated none  |                                   |
| decoherence_scheme edc   |                                   |
| decoherence_param 0.1    |                                   |
| hopping_procedure sharc  |                                   |
| grad_all                 |                                   |
| nac_all                  |                                   |
| select_directly          |                                   |
| write_overlap            |                                   |
| output_format ascii      |                                   |
| output_dat_steps 1       |                                   |

## Section S6. Potential energies as functions of C–S internuclear distance

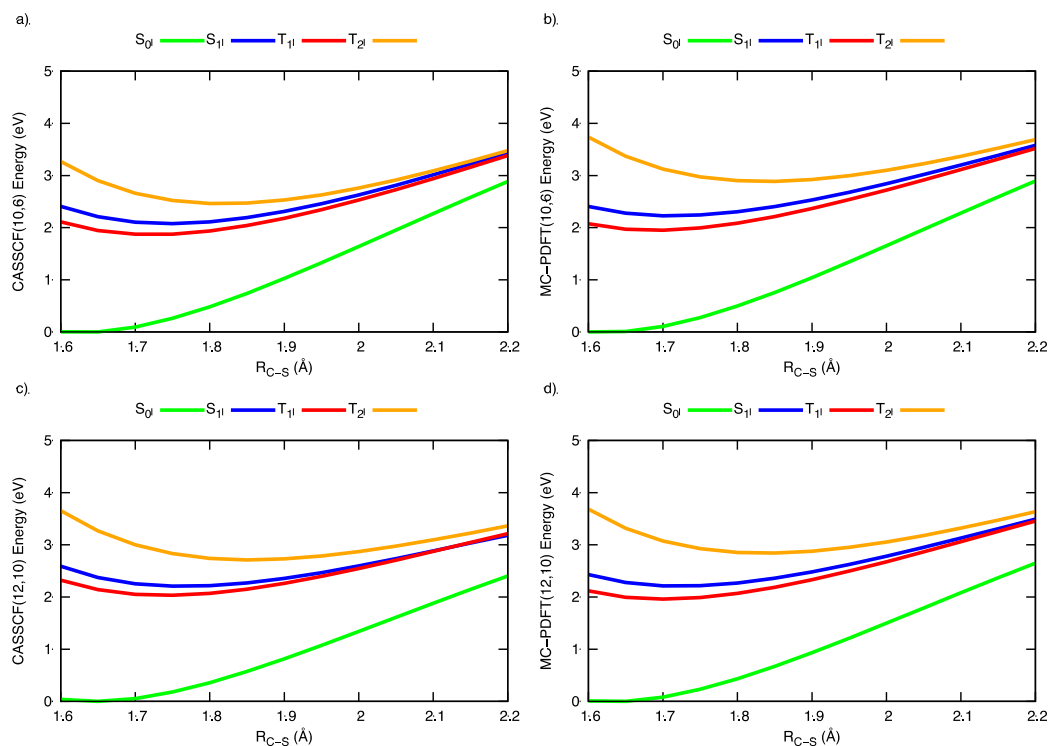

**Figure S2.** Potential energy scans along the C–S bond distance for (a) SA-CASSCF(10,6), (b) MC-PDFT(10,6), (c) SA-CASSCF(12,10), and (d) MC-PDFT(12,10). The C–S bond was stretched while keeping all other internal coordinates fixed at their values in the  $S_0$  optimized structure.

## References

1. Mai, S.; Atkins, A. J.; Plasser, F.; González, L. The Influence of the Electronic Structure Method on Intersystem Crossing Dynamics. The Case of Thioformaldehyde. *J. Chem. Theory Comput.* **2019**, *15*, 3470-3480.
2. Barbatti, M.; Granucci, G.; Persico, M.; Ruckebauer, M.; Vazdar, M.; Eckert-Maksić, M.; Lischka, H. The On-The-Fly Surface-Hopping Program System Newton-X: Application to Ab Initio Simulation of the Nonadiabatic Photodynamics of Benchmark Systems. *J. Photochem. Photobiol., A* **2007**, *190*, 228-240.
